# Supplementary material
Source: Springer Nature journal article supplement (https://www.springermedizin.de/resource/supplementary/12936_2012_2233_MOESM5_ESM.pdf/9542614)
Supplement: MOESM5 [file 9542614]

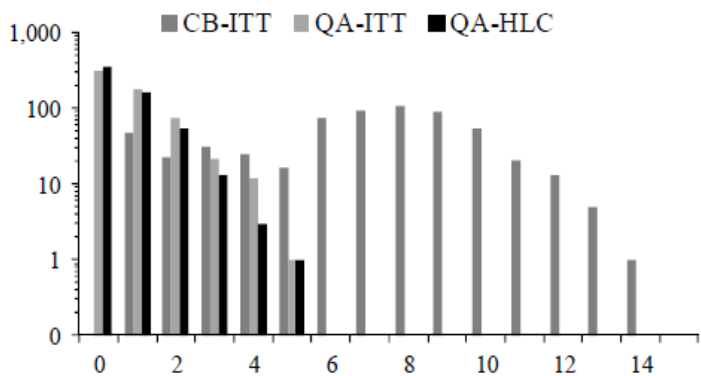

Number of trap nights per location

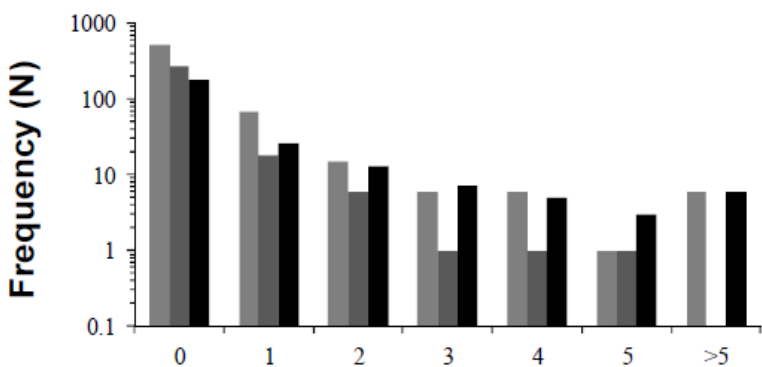

Mean *Anopheles gambiae* catch per trap night

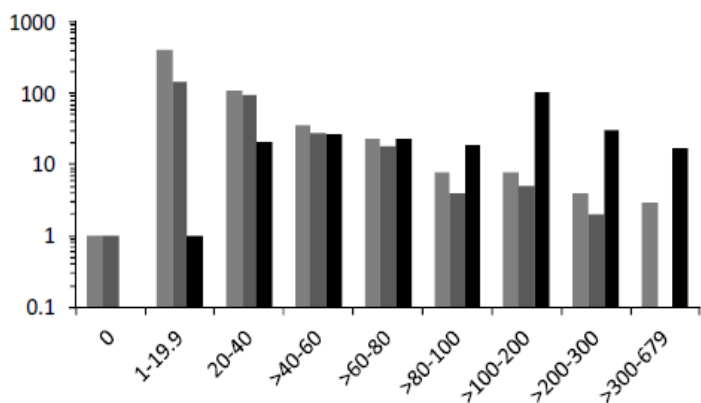

Mean culicine catch per trap night
